# Supplementary material
Source: MDPI journal article supplement (https://www.mdpi.com/2073-4395/10/1/100)

**Table S1. Correlation coefficients between sunflower broomrape germination of various maize cultivars in different experiments**

| Factor        | Rhizosphere soil<br>extracts | Root exudates | Co-culture | Xylem sap | Extracts (1 g mL <sup>-1</sup> ) |         |      |
|---------------|------------------------------|---------------|------------|-----------|----------------------------------|---------|------|
|               |                              |               |            |           | Leaf                             | Root    | Stem |
| Root exudates | 0.820**                      |               |            |           |                                  |         |      |
| Co-culture    | 0.696**                      | 0.780**       |            |           |                                  |         |      |
| Xylem sap     | 0.723**                      | 0.746**       | 0.550**    |           |                                  |         |      |
| Leaf extracts | 0.725**                      | 0.635**       | 0.600**    | 0.653**   |                                  |         |      |
| Root extracts | 0.406**                      | 0.662**       | 0.503**    | 0.495**   | 0.483**                          |         |      |
| Stem extracts | 0.806**                      | 0.644**       | 0.656**    | 0.665**   | 0.715**                          | 0.434** |      |

\* Significant at the 0.05 probability level. \*\* Significant at the 0.01 probability level.

Figure S1 Diagram of the maize broomrape co-culture assay procedure.

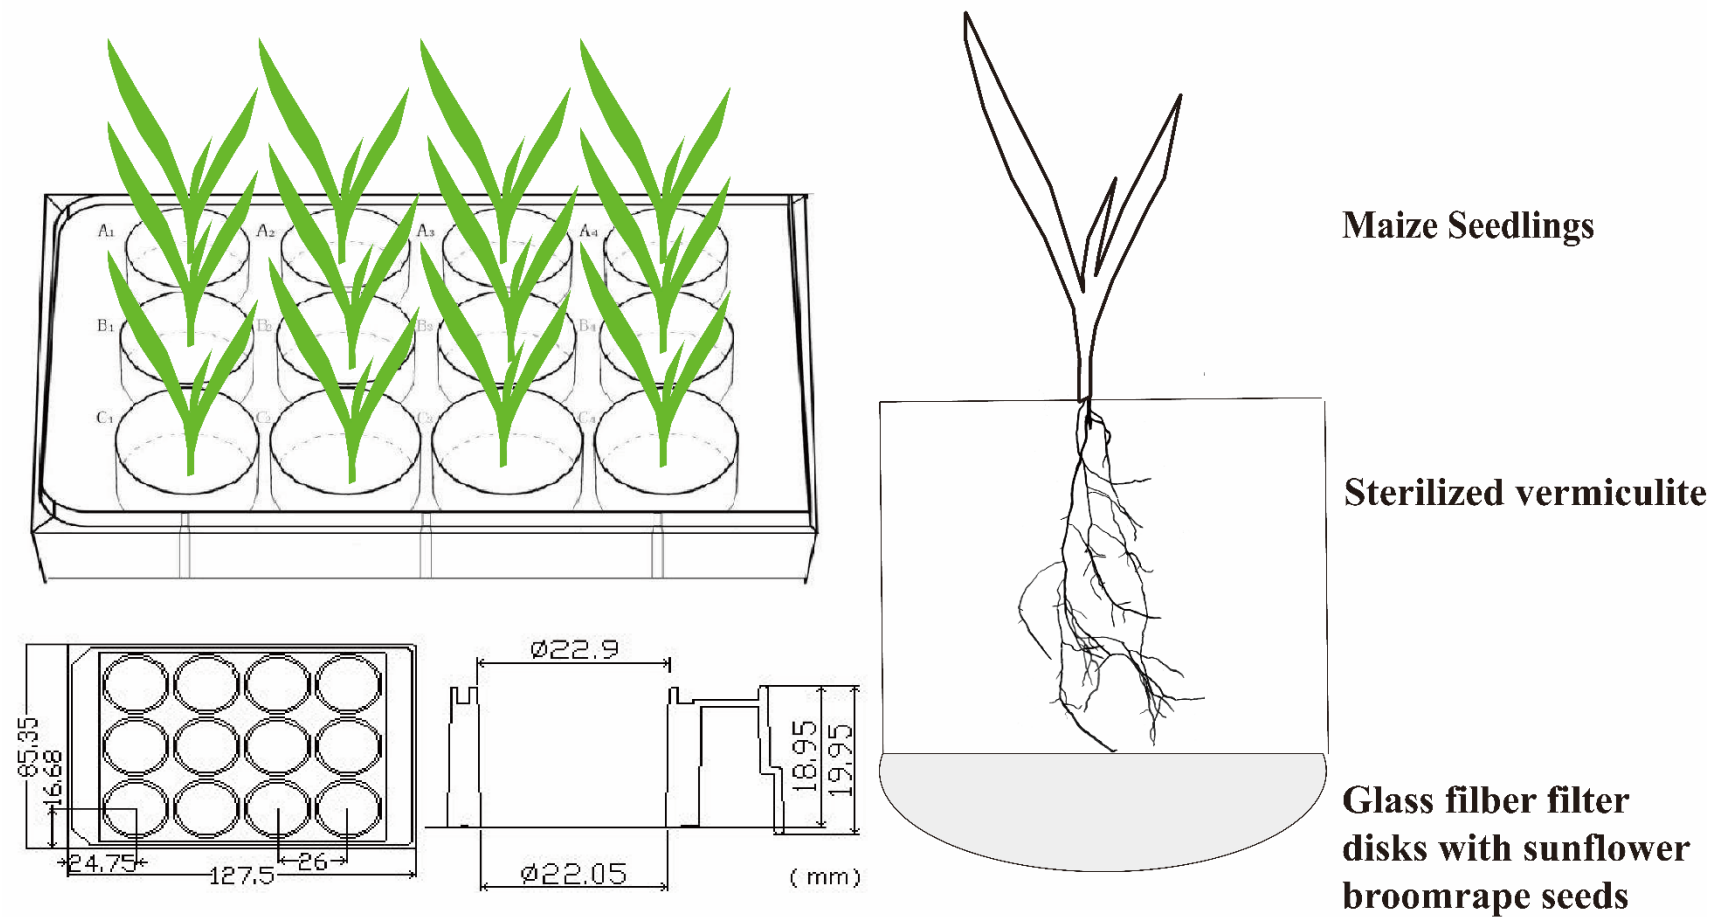

Figure S2 Meteorological data of experimental site during trails obtained from a HOBO weather station (Onset, Bourne, MA, USA). The bars represent maximum and minimum temperature (in °C) whilst the line diagram represents monthly average temperature (in °C).

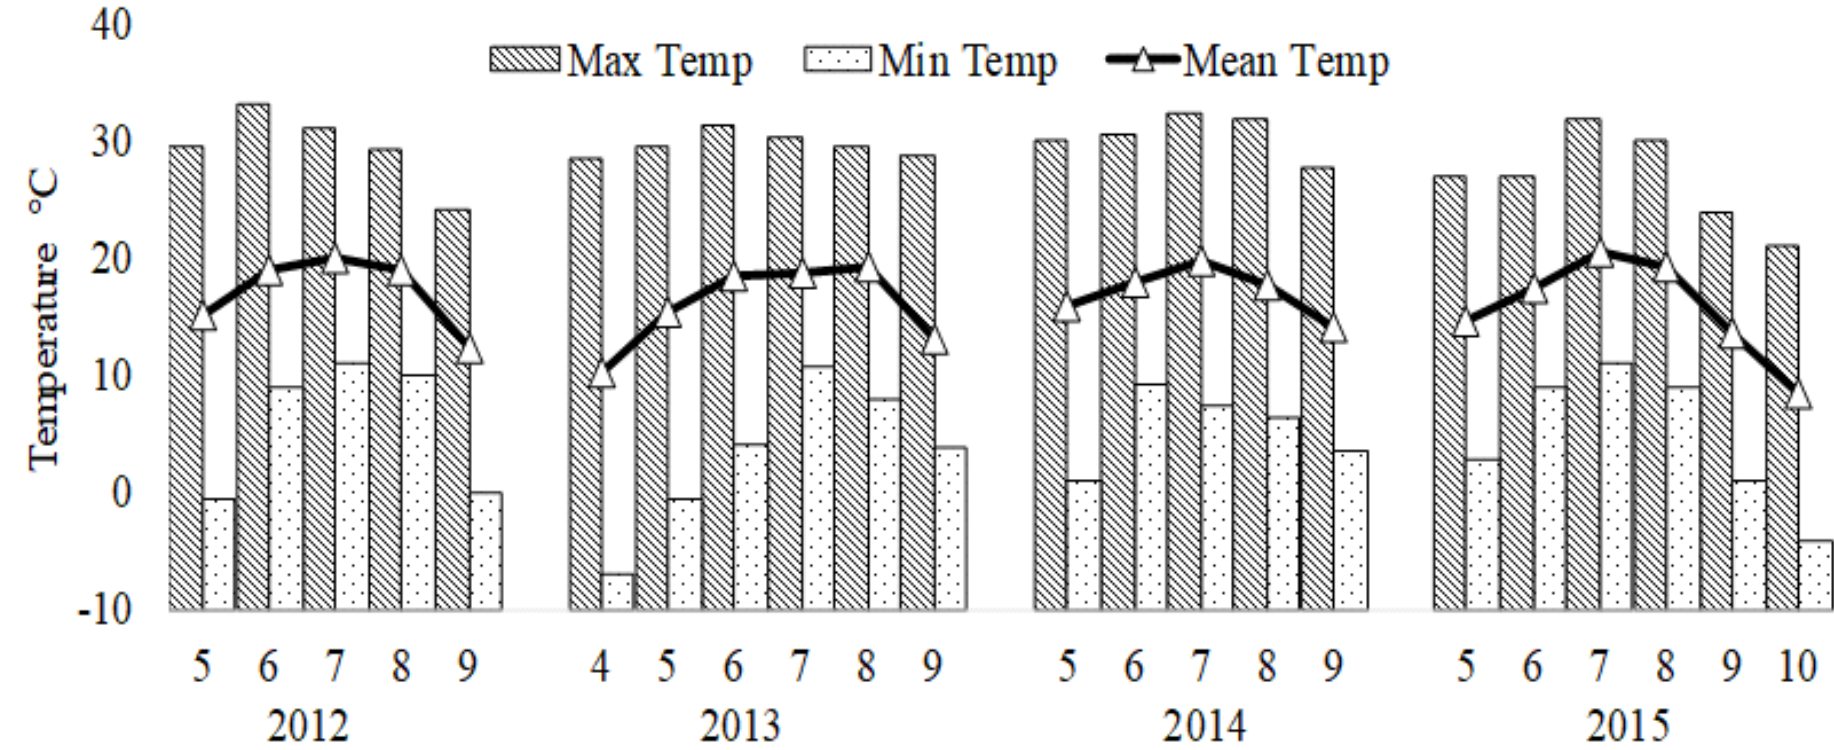

Supplement: s1 [file s1]
